# Supplementary material for: Relationship between locomotive syndrome risk test and height and weight in infancy and toddlerhood: a preliminary study
Source: PeerJ. 2025 Sep 25;13:e20114. doi: 10.7717/peerj.20114 (PMC12476858; doi:10.7717/peerj.20114)
Supplement: Supplemental Information 2 [file peerj-13-20114-s002.xlsx]

## Sheet: Sheet1
ID	Height at birth	Weight at birth	Height at age 1	Weight at age 1	Height at age 3	Weight at age 3	Age	SEX(Male=0, Female=1)	Height	Body weight	BMI	Grip strength	Two-step length	Two-step test value	Stand-up test	GLFS-25Q1	GLFS-25Q2	GLFS-25Q3	GLFS-25Q4	GLFS-25Q5	GLFS-25Q6	GLFS-25Q7	GLFS-25Q8	GLFS-25Q9	GLFS-25Q10	GLFS-25Q11	GLFS-25Q12	GLFS-25Q13	GLFS-25Q14	GLFS-25Q15	GLFS-25Q16	GLFS-25Q17	GLFS-25Q18	GLFS-25Q19	GLFS-25Q20	GLFS-25Q21	GLFS-25Q22	GLFS-25Q23	GLFS-25Q24	GLFS-25Q25	GLFS-25score	LS (Presence=1, Absence=0)	Exercise habits(Presence=0, Absence=1)
1	47	3144	73.1	8900	94.2	13750	22	1	156	76.2	31.3	25.8	210	1.3	6	0	1	0	0	0	0	0	0	0	0	0	0	0	0	1	0	0	0	0	0	1	0	0	0	1	4	0	0
2	48	2858	73.6	9660	93.2	14100	21	1	159	52	20.6	27.4	252	1.6	5	0	0	0	0	0	0	0	0	0	0	0	0	0	0	0	0	0	0	0	0	0	0	0	0	0	0	0	0
3	48	2692	73.3	8000	97.6	14000	21	1	164	50.2	18.7	27.2	280	1.7	5	0	0	0	0	0	0	0	0	0	0	0	0	0	0	0	0	0	0	0	0	1	0	0	0	0	1	0	0
4	48.6	3380	79	9800	97.8	15150	21	1	156	56	23	28.3	244	1.6	5	0	0	0	0	0	0	0	0	0	0	0	0	0	0	0	0	0	0	0	0	0	0	0	0	0	0	0	0
5	52	3235	70.5	7340	94.3	14300	20	1	151	43	18.9	27.5	255	1.7	8	0	0	0	0	0	0	0	0	0	0	0	0	0	0	0	0	0	0	0	0	0	0	0	0	0	0	0	1
6	49.5	2800	78.5	9500	96.8	16000	21	1	163	53	19.9	22.8	234	1.4	4	0	0	0	0	0	0	0	0	0	0	0	0	0	0	0	0	0	0	0	0	0	0	0	0	0	0	1	0
7	52.5	3484	84.4	12700	99.9	15800	21	0	180	78	24.1	49.2	327	1.8	8	0	0	0	0	0	0	0	0	0	0	0	0	0	0	0	0	0	0	0	0	0	0	1	0	0	1	0	0
8	50	2712	72	8360	93.3	13700	21	1	153	52	22.2	30.7	269	1.8	8	0	0	0	0	0	0	0	0	0	0	0	1	1	0	1	0	1	1	0	1	2	1	1	0	0	10	1	1
9	48	3066	75.1	10405	97	15600	21	1	160	56	21.9	32.6	269	1.7	7	0	0	0	0	0	0	0	0	0	0	0	0	0	0	0	0	0	0	0	0	0	1	2	0	0	3	0	0
10	49	3284	75	9470	94.3	13400	21	1	166	43	15.6	25.4	273	1.6	3	0	0	0	0	1	0	0	0	0	0	0	0	0	0	0	0	0	0	0	0	0	0	0	0	1	2	1	1
11	45.2	2926	71	8400	93.3	13150	21	1	157.7	47	18.9	19.5	255	1.6	5	0	0	0	0	0	0	0	0	0	0	0	1	1	0	0	1	1	1	0	1	2	0	0	0	0	8	1	1
12	51	3594	81.2	10750	95.5	13200	21	0	178.8	55.2	17.3	35.7	310	1.7	8	0	0	1	0	0	0	0	0	0	0	0	0	0	0	0	0	0	0	0	0	0	0	4	0	0	5	0	0
13	51	3354	76.3	9555	93.4	14200	21	1	165.1	56	20.5	33.2	299	1.8	7	0	0	0	0	0	0	0	0	0	0	0	0	0	0	0	0	1	0	0	0	0	0	0	0	0	1	0	0
14	51	3558	76.5	9800	92	13800	ー	1	152.7	42.2	18.1	25	234	1.5	5	1	0	0	0	0	0	0	0	0	0	0	1	1	0	1	0	0	0	0	0	1	1	1	0	0	7	1	1
15	46	2250	70.5	8525	90	12500	21	1	147	43	19.9	25	195	1.3	6	0	0	0	0	0	0	0	0	0	0	0	0	0	0	1	0	1	0	0	0	0	0	0	0	0	2	0	0
16	47.2	2940	78.8	10300	92.8	13860	21	1	157	67	27.2	27.1	261	1.7	5	0	0	0	0	0	0	0	0	0	0	0	0	0	0	0	0	0	0	0	0	0	0	0	0	0	0	0	1
17	47.4	3105	73.3	10500	94.7	16100	21	0	164.3	57.4	21.3	44.3	297	1.8	8	1	1	2	0	0	0	0	0	0	0	0	0	0	0	1	0	0	0	0	0	1	0	1	0	1	8	1	0
18	51	3280	75.2	8210	96.3	14060	21	1	159	44	17.4	23.1	238	1.5	6	0	0	0	0	0	0	0	0	0	0	0	0	0	0	0	0	0	0	0	0	0	0	0	0	0	0	0	1
19	51.8	3650	73	7400	91.5	11200	21	0	164	53	19.7	39.3	289	1.8	8	0	0	0	0	0	0	0	0	0	0	0	0	0	0	0	0	0	0	0	0	0	0	0	0	0	0	0	0
20	52.5	2540	74	8200	95.6	14250	21	1	160.4	ー	ー	27.2	256	1.6	5	0	0	0	0	0	0	0	0	0	0	0	0	0	0	0	0	0	0	0	0	0	0	0	0	0	0	0	0
21	48.8	2740	82.1	10500	97.8	14200	21	0	175	60	19.6	30.8	303	1.7	6	0	0	0	0	0	0	0	0	0	0	0	0	0	0	0	0	0	0	0	0	0	0	0	0	0	0	0	0
22	48.5	3376	81.8	11400	96.4	15000	21	0	175	57	18.6	45.8	311	1.8	8	0	0	0	0	1	0	0	0	0	0	0	0	0	0	0	0	0	0	0	0	0	0	0	0	0	1	0	0
23	51.5	2885	73.2	8200	89	11650	21	0	167	65	23.3	45.1	290	1.7	4	0	0	0	0	0	0	0	0	0	0	0	0	0	0	0	0	0	0	0	0	0	0	0	0	0	0	1	1
24	44.6	2795	75.2	8240	86	11180	21	1	151	40	17.5	28.1	238	1.6	8	0	0	0	0	0	0	0	0	0	0	0	0	0	1	1	1	0	0	1	1	1	0	0	0	0	6	0	0
25	47	2752	69	7200	91.8	12700	20	1	158	40	16	25.8	255	1.6	7	0	0	0	0	0	0	0	0	0	0	0	0	0	0	0	0	0	0	0	0	0	0	0	0	0	0	0	0
26	47	2706	72	8150	95.2	12500	20	1	165	53.5	19.7	20.4	262	1.6	6	0	0	0	0	0	0	0	0	0	0	0	0	0	0	0	0	0	0	0	0	0	0	0	0	0	0	0	1
27	50	3160	78.9	10250	102.8	17680	20	1	166	60.5	22	27.5	266	1.6	5	0	1	1	0	0	0	0	0	0	0	0	1	0	0	0	0	0	1	0	0	1	0	0	0	0	5	0	0
28	52	3055	79.4	9400	90.5	13200	20	1	163.7	51.4	19.2	26	257	1.6	4	0	0	0	0	0	0	0	0	0	0	0	0	0	0	0	0	0	0	0	0	0	0	0	0	0	0	1	0
29	49	2940	72.7	8235	92.1	12500	20	1	150.1	38	16.9	24.7	272	1.8	8	0	2	1	0	0	0	0	0	0	0	0	1	1	0	0	0	1	0	0	0	1	0	0	0	1	8	1	0
30	52	3582	77	7200	100.7	15300	19	1	158.2	53.3	21.3	25.2	261	1.6	5	0	0	0	0	0	0	0	0	0	0	0	0	0	0	1	0	0	0	0	0	0	0	0	0	0	1	0	1
31	47	2964	78	8700	91.4	12900	19	0	173.2	63.2	21.1	44.5	269	1.6	7	0	0	0	0	0	0	0	0	0	0	0	1	0	0	0	0	0	0	0	0	0	0	0	0	0	1	0	0
32	52.5	3480	85.3	10900	99	14100	19	1	165	54.5	20	26.4	281	1.7	7	0	0	0	0	0	0	0	0	0	0	0	0	0	0	0	0	0	0	0	0	0	0	0	0	0	0	0	0
33	48	2534	81	10800	95.5	14600	19	1	160	50	19.5	22.2	237	1.5	5	0	0	0	0	0	0	0	0	0	0	0	0	0	0	0	0	0	0	0	0	0	0	0	0	0	0	0	0
34	45.8	2944	74.6	9700	91.1	13100	19	0	163	63	23.7	44	257	1.6	6	0	0	1	0	0	0	0	0	0	0	0	2	1	0	1	0	1	0	1	2	2	0	0	0	0	11	1	1
35	50.5	3230	75.2	9805	99.6	15650	19	0	176.6	70.4	22.6	43.3	319	1.8	8	0	1	0	0	0	0	0	0	0	0	0	0	0	0	0	0	0	0	0	0	0	0	0	0	0	1	0	0
36	46.7	2548	73.7	8500	86.4	10900	19	1	154.3	ー	ー	25.7	260	1.7	5	0	0	0	0	0	0	0	0	0	0	0	1	0	0	0	0	0	0	0	0	0	0	0	1	0	2	0	0
37	44	2136	71.5	7700	90.2	12600	19	1	153	48	20.5	24.6	230	1.5	6	0	0	0	0	0	0	0	0	0	0	0	0	0	0	1	0	0	0	0	0	0	0	0	0	0	1	0	0
38	49.8	3040	75.6	9400	94.3	13200	19	1	158	44	17.6	25	258	1.6	5	0	0	1	0	0	0	0	0	0	0	0	0	0	0	0	0	0	0	0	0	0	0	0	0	0	1	0	1
39	48	2716	70.5	8800	91	13400	19	0	163.3	60	22.5	38.1	280	1.7	8	0	0	0	0	0	0	0	0	0	0	0	1	0	0	0	0	0	0	0	0	0	0	0	0	0	1	0	0
40	48	2720	73	8610	91.9	13500	19	1	156.8	45	18.3	20.3	233	1.5	5	0	0	0	0	0	0	0	0	0	0	0	0	0	0	1	0	0	0	0	0	0	0	0	0	0	1	0	0
41	52	3588	81.5	11150	96.6	14700	19	0	174	58	19.2	43.3	291	1.7	8	0	0	0	0	0	0	0	0	0	0	0	0	0	0	0	0	0	0	0	0	0	0	0	0	0	0	0	0
42	50.5	3455	77.8	10850	96.3	14900	19	0	180	68	21	47.4	275	1.5	4	0	0	0	0	0	0	0	0	0	0	0	0	0	0	0	0	0	0	1	1	0	0	0	0	0	2	1	0
43	50	2946	78.8	10500	101.8	17500	19	1	169	63	22.1	35.1	253	1.5	4	0	0	1	0	0	0	0	0	0	0	0	0	0	0	0	0	0	0	0	0	1	0	1	0	0	3	1	0
44	49.5	2750	74	8650	96.3	15150	19	1	163	65	24.5	23.2	233	1.4	4	0	0	0	0	0	0	0	0	0	0	0	0	0	0	0	0	0	0	0	0	0	0	0	0	0	0	1	0
45	46.8	3140	70.1	8100	92.3	13000	18	1	158	42	16.8	27.9	240	1.5	5	0	0	0	0	0	0	0	0	0	0	0	0	0	0	1	0	0	0	0	0	0	1	0	0	0	2	0	0
46	49	3132	72.5	9400	88	13250	18	1	152	49	21.2	27.9	233	1.5	6	0	0	0	0	0	0	0	0	0	0	0	0	0	0	0	0	0	1	0	0	1	0	0	0	1	3	0	0
47	47.4	2740	72.7	9600	95.6	14100	18	1	156	45	18.5	29.4	224	1.4	5	0	0	0	0	0	0	0	0	0	0	0	0	1	0	1	0	1	0	0	1	1	0	0	0	0	5	0	1
48	48	3128	73.2	9530	91	14800	18	1	146	42	19.7	17.6	222	1.5	6	0	0	0	0	0	0	0	0	0	0	0	1	0	0	0	0	0	0	1	1	1	0	1	0	0	5	0	0
49	49.5	3234	80.5	10900	95	14950	19	0	172.7	72.4	24.3	45.7	291	1.7	5	0	1	0	0	0	0	0	0	0	0	0	0	0	0	1	0	0	0	0	0	0	0	0	0	0	2	0	0
50	50	3000	80	9900	92.8	12400	18	1	160	54	21.1	27.9	272	1.7	4	0	0	0	0	0	0	0	0	0	0	0	0	0	0	0	0	0	0	0	0	0	0	0	0	0	0	1	1
51	46	2452	72	8400	86	11600	18	1	153	46	19.7	25.1	261	1.7	7	0	0	0	0	0	0	0	0	0	0	0	0	0	0	2	0	0	0	0	0	0	0	0	0	0	2	0	0
52	52	3342	79.5	9980	98.6	14560	18	0	173	66.5	22.2	36.2	277	1.6	5	0	0	1	0	0	0	0	0	0	0	0	0	0	0	1	0	1	1	0	0	0	1	2	0	0	7	1	0
53	51.4	3450	73.9	9100	98.7	15500	18	1	166.5	53	19.1	34.6	276	1.7	5	0	0	0	0	0	0	0	0	0	0	0	0	0	0	0	0	0	0	0	0	0	0	0	0	0	0	0	0
54	52.1	4100	74.8	8935	97.9	16450	18	1	164	55	20.4	31	270	1.6	5	0	0	0	0	0	0	0	0	0	0	0	0	0	0	0	0	0	0	0	0	0	0	0	0	0	0	0	0
55	48	2596	77.4	9525	98.4	14200	18	0	175	58.5	19.1	42.8	252	1.4	5	0	0	1	0	0	0	0	0	0	0	0	0	1	0	1	0	0	0	0	0	1	0	0	0	1	5	0	0
56	44	2390	70	8300	87.7	12400	18	1	152	47	20.3	27.6	254	1.7	8	0	0	0	0	0	0	0	0	0	0	0	0	0	0	0	0	0	0	0	0	0	0	0	0	0	0	0	0
57	50	3715	73	9000	89	12000	18	0	168	50	17.7	37	273	1.6	6	0	0	0	0	0	0	0	0	0	0	0	0	0	0	1	0	1	0	0	0	0	0	0	0	0	2	0	0
58	47.1	2690	70	7700	87.2	11380	18	1	153	49	20.9	23.7	266	1.7	6	0	0	0	0	0	0	0	0	0	0	0	0	1	0	1	0	0	1	0	0	0	0	0	0	0	3	0	1
59	49	2960	82.6	12350	97.3	16850	18	1	157	55	22.3	25.6	249	1.6	4	0	0	0	0	0	0	0	0	0	0	0	1	1	0	0	0	0	0	0	1	1	0	0	0	1	5	1	0
60	47.9	2830	76.4	9200	91.2	12480	18	1	155	42	17.5	33	221	1.4	6	0	0	0	0	0	0	0	0	0	0	0	0	0	0	2	0	0	0	0	0	1	0	1	0	0	4	0	0
61	48.6	2788	73.6	8300	91.5	12000	18	1	158.6	50	19.9	23.1	249	1.6	5	0	0	0	0	0	0	0	0	0	0	0	0	0	0	1	0	0	0	0	0	1	1	1	0	0	4	0	0
62	49	2874	79	9600	90	12550	18	1	153	49	20.9	23.2	229	1.5	5	0	0	0	0	0	0	0	0	0	0	0	1	0	1	0	0	1	0	0	0	1	0	1	1	0	6	0	0
